# Supplementary material for: Comparative genomics analysis of statistically significant genomic islands of Helicobacter pylori strains for better understanding the disease prognosis
Source: Oxford University Press journal article supplement (doi:10.1042/bsr20212084), 2022-03-01
Supplement: bsr-2021-2084_supp.pdf [file bsr-2021-2084_supp.pdf]

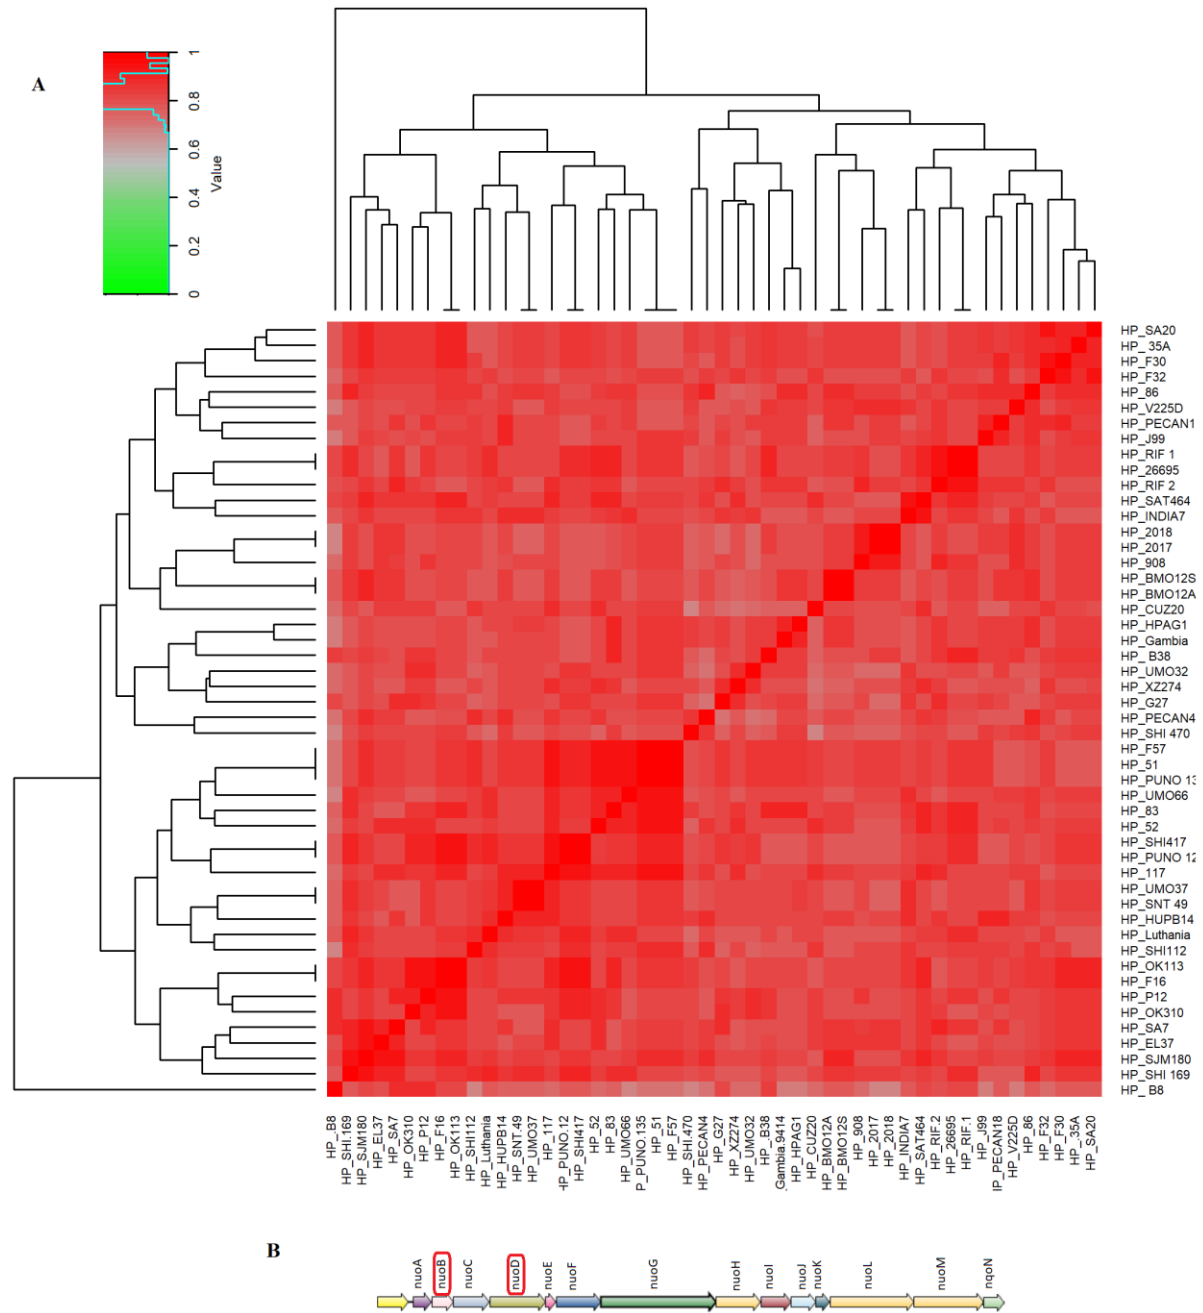

**Supplementary Figure1.** Comparative genomic study of Core\_3 in fifty strains of *Helicobacter pylori*. A. Heatmap of Core\_3 generated from square matrices of similarity score among the fifty *H. pylori* strains. B. Synteny of Core\_3 Genomic island in all fifty *H. pylori* strains. Four missense mutations in the NuoB and NuoD genes have resulted in the emergence of benzimidazole-resistant *H. pylori* strains.

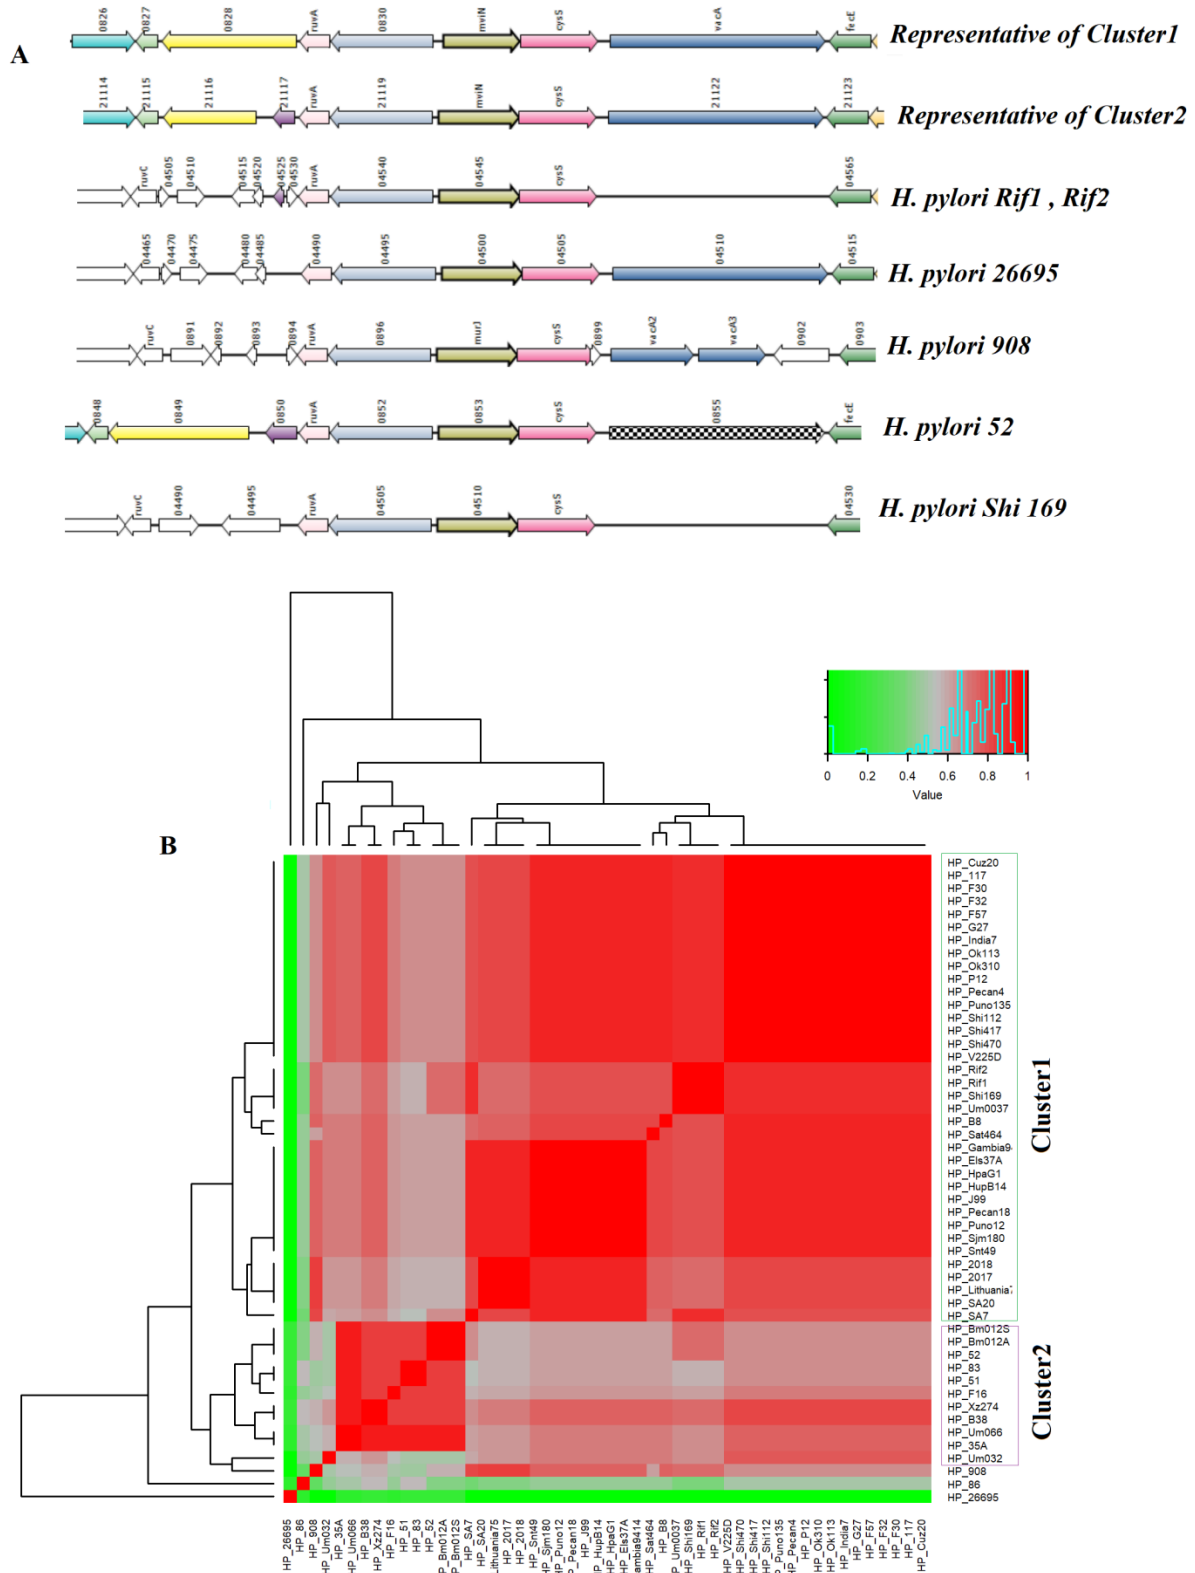

**Supplementary Figure 2.** Comparative genome study of Core\_4. **A.** Synteny of representative strains of Core\_4. **B.** Heatmap of similarity scores using hierarchical clustering. Fifty strains showed two major clusters. Red:  $S_m \geq 0.70$ ; Grey:  $S_m: \geq 0.4-0.69$ , Green:  $S_m \leq 0.39$ .

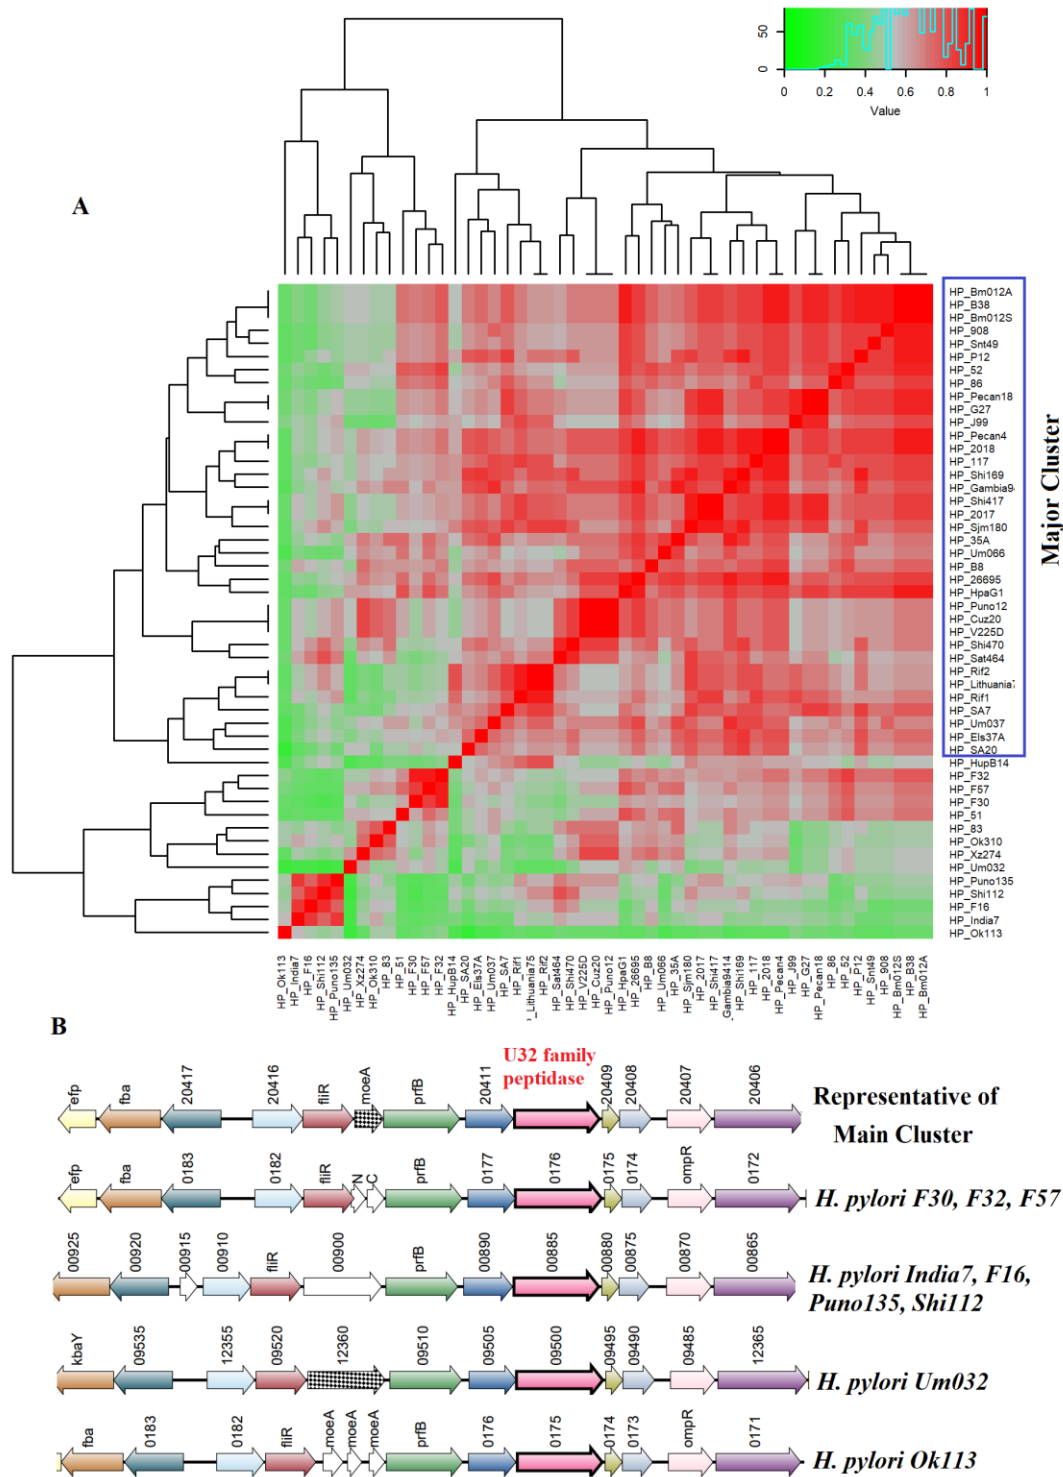

**Supplementary Figure 3.** Comparative genomic study of Core<sub>6</sub> in fifty strains of *Helicobacter pylori*. A. Heatmap of similarity scores using hierarchical clustering. Fifty strains showed one main cluster. Red:  $S_m \geq 0.70$ ; Grey:  $S_m \geq 0.4-0.69$ , Green:  $S_m \leq 0.39$ . B. Synteny of representative strains of Core<sub>6</sub>. U32 family protein was conserved among the strains.

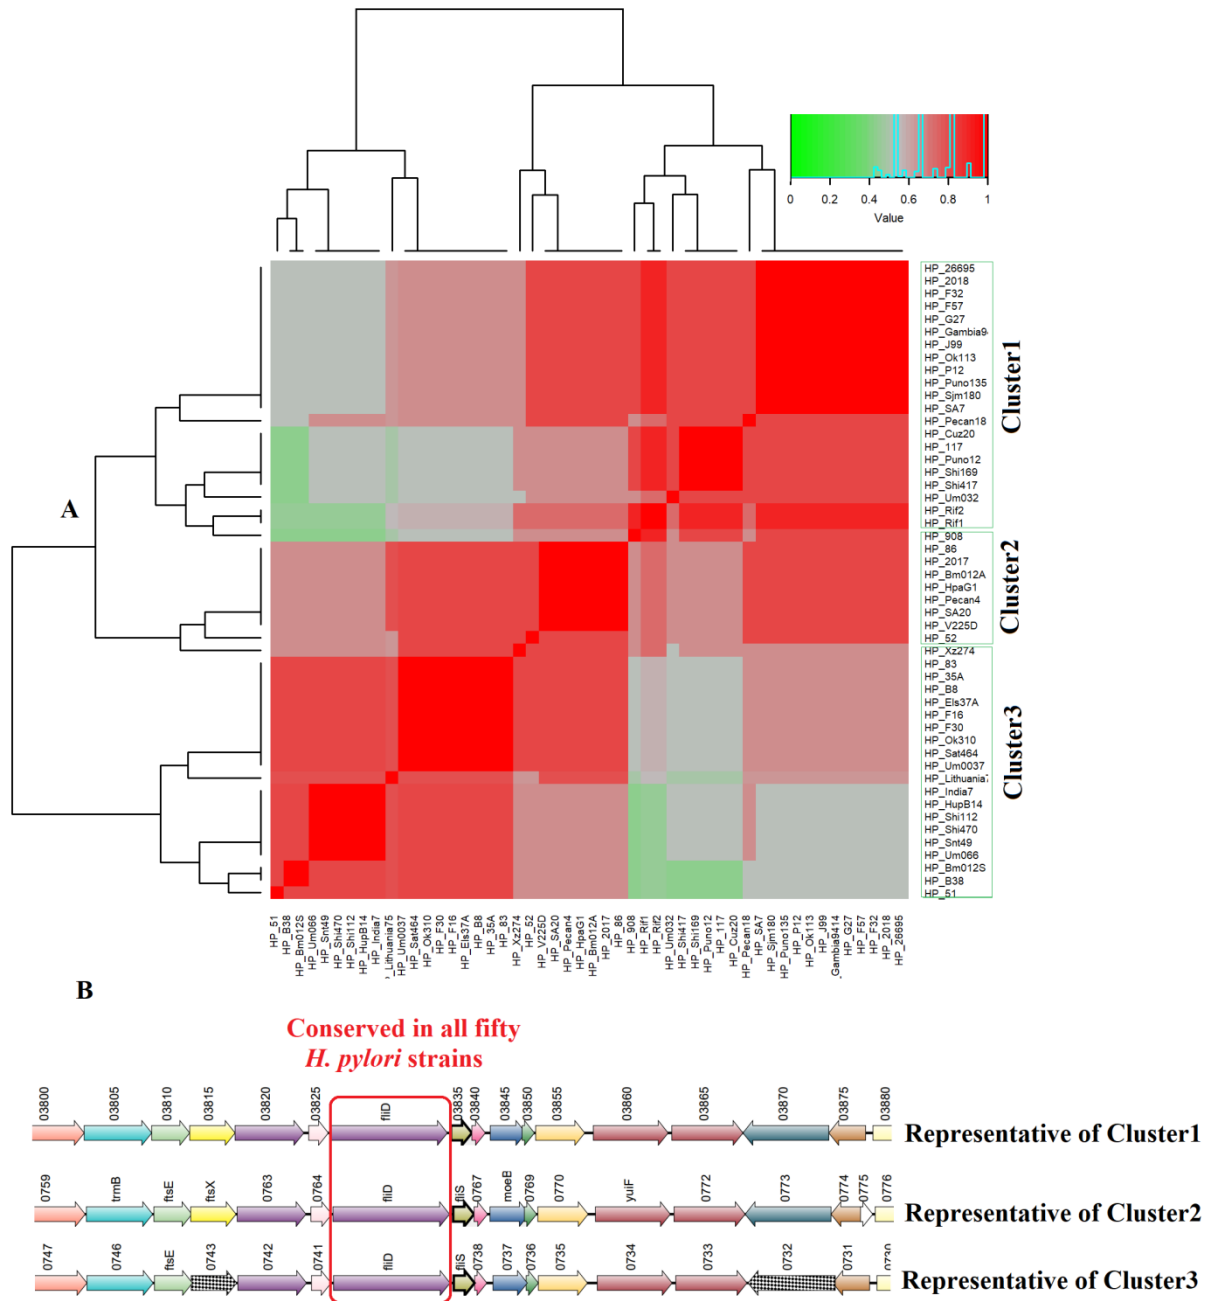

**Supplementary Figure 4.** Comparative genomic study of Core\_7 in fifty strains of *Helicobacter pylori*. A. Heatmap of similarity scores using hierarchical clustering. Fifty strains formed three major clusters. Red:  $S_m \geq 0.70$ ; Grey:  $S_m: \geq 0.4-0.69$ , Green:  $S_m \leq 0.39$ . Fifty strains showed two main clusters. B. Synteny of representative strains from each clusters. *flaD* is present in all the fifty strains.

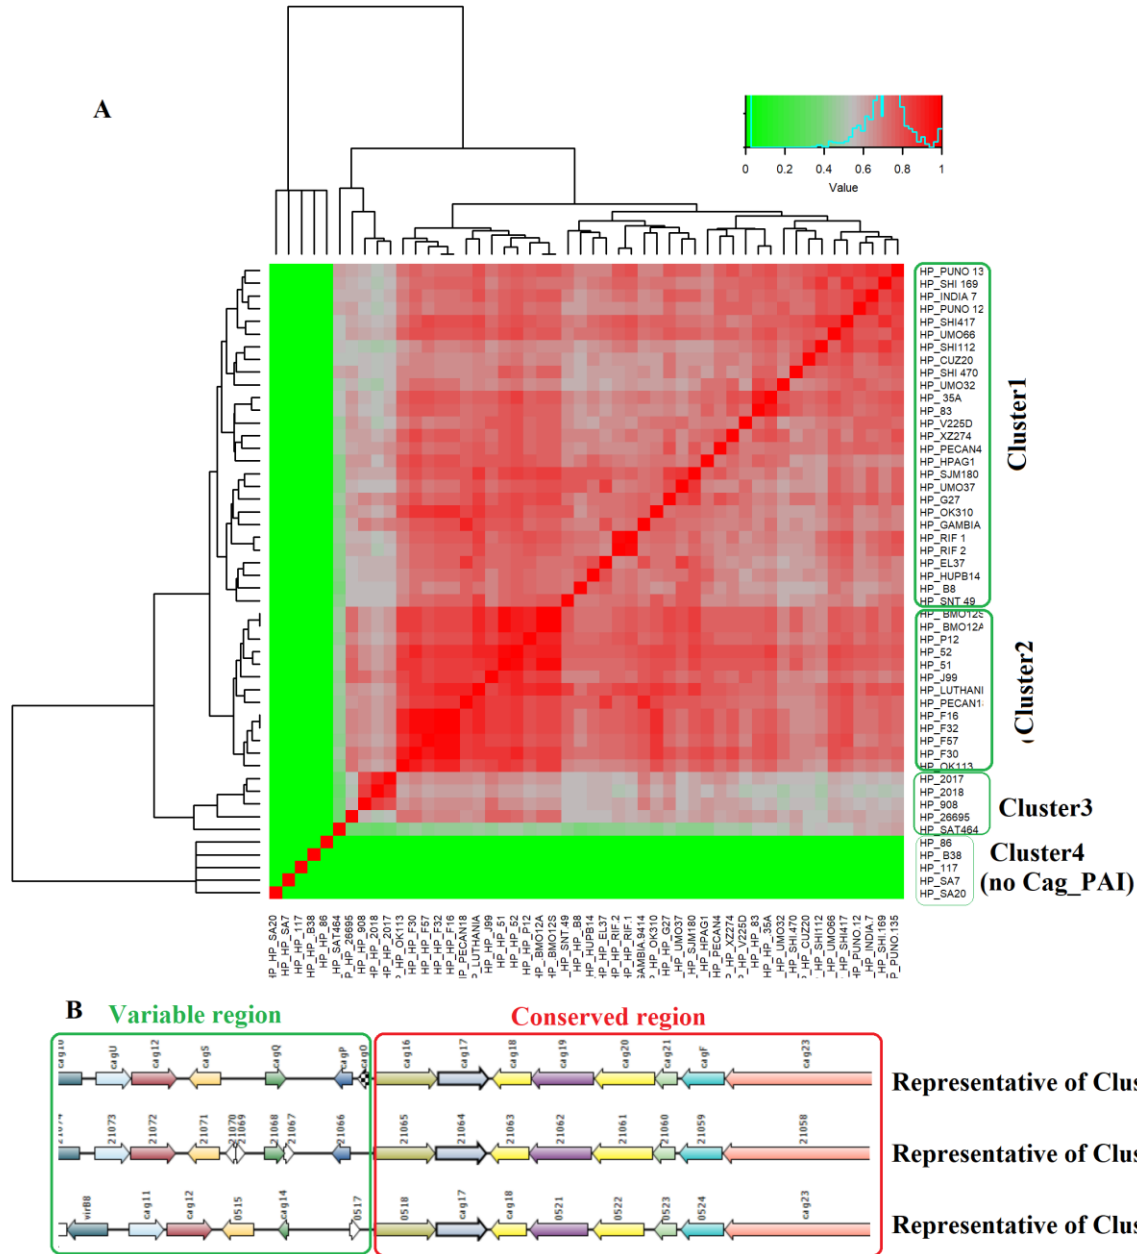

**Supplementary Figure 5.** Comparative genomic study of Cag Pathogenicity Island (Acc\_25) in fifty strains of *Helicobacter pylori*. **A.** Heatmap of similarity scores using hierarchical clustering. Red:  $S_m \geq 0.70$ ; Grey:  $S_m \geq 0.4-0.69$ , Green:  $S_m \leq 0.39$ . Fifty strains showed four main clusters. Cluster4 represents cag –ve strains. **B.** Synteny of representative strains from each cluster. The region highlighted in red is the most variable part of the Cag PAI.

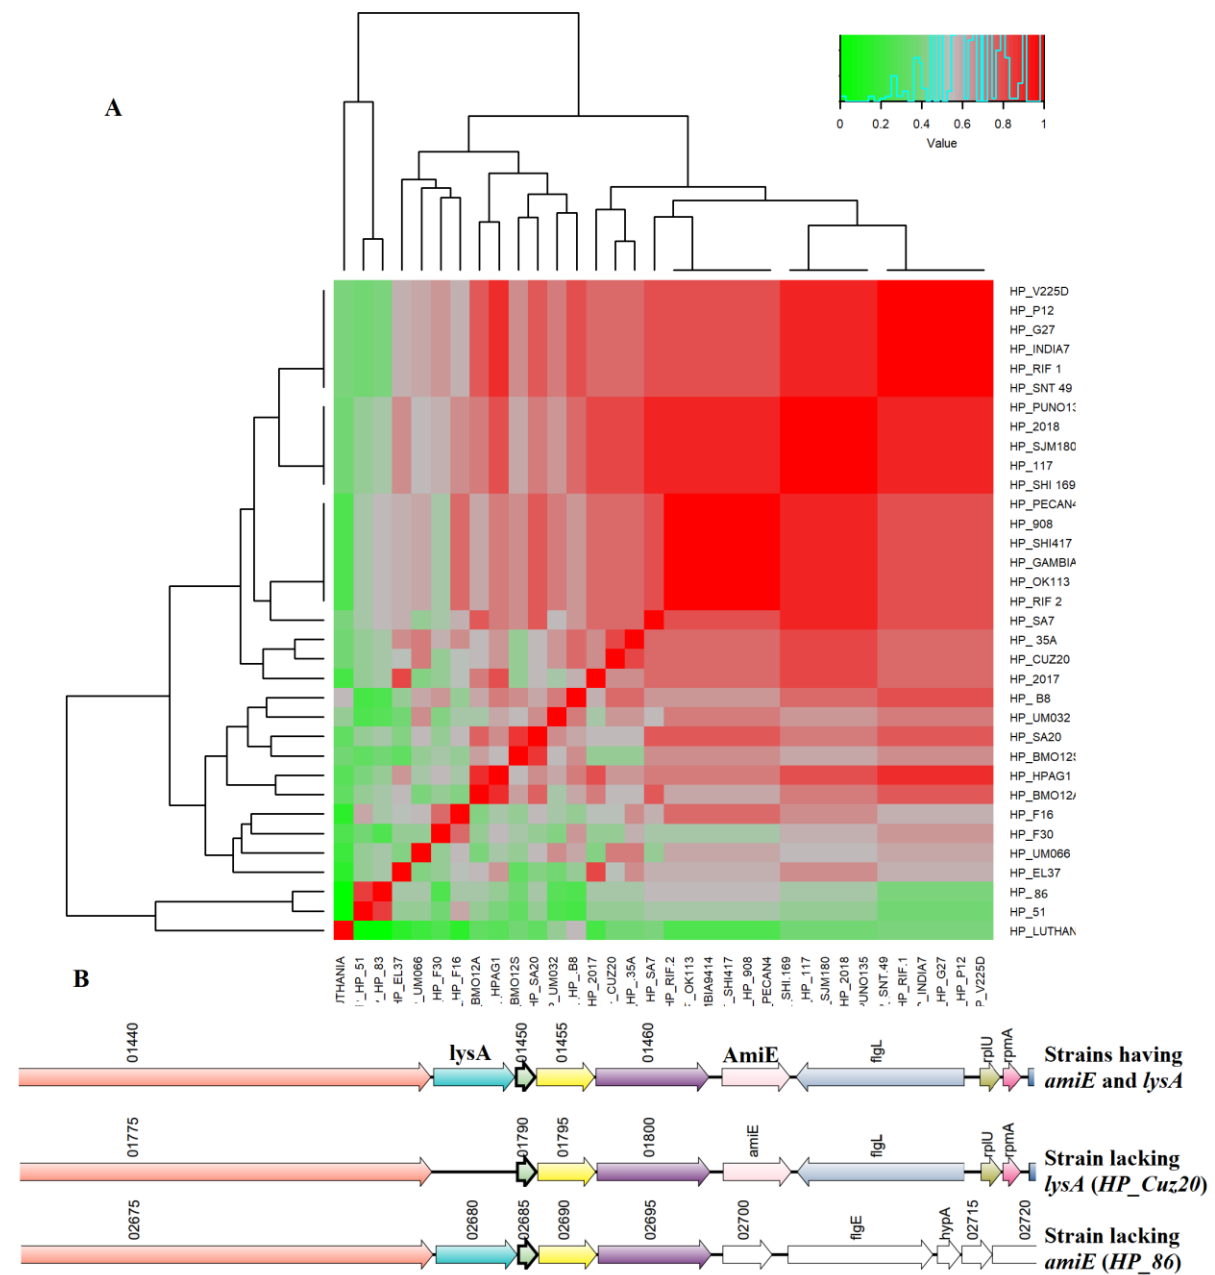

**Supplementary Figure 6.** Comparative genomic study of Acc<sub>14</sub> in fifty strains of *Helicobacter pylori*. **A.** Heatmap of similarity scores using hierarchical clustering. Red:  $S_m \geq 0.70$ ; Grey:  $S_m: \geq 0.4-0.69$ , Green:  $S_m \leq 0.39$ . **B.** Synteny of representative strains based on the presence and absence of *lysA* and *amiE* gene.

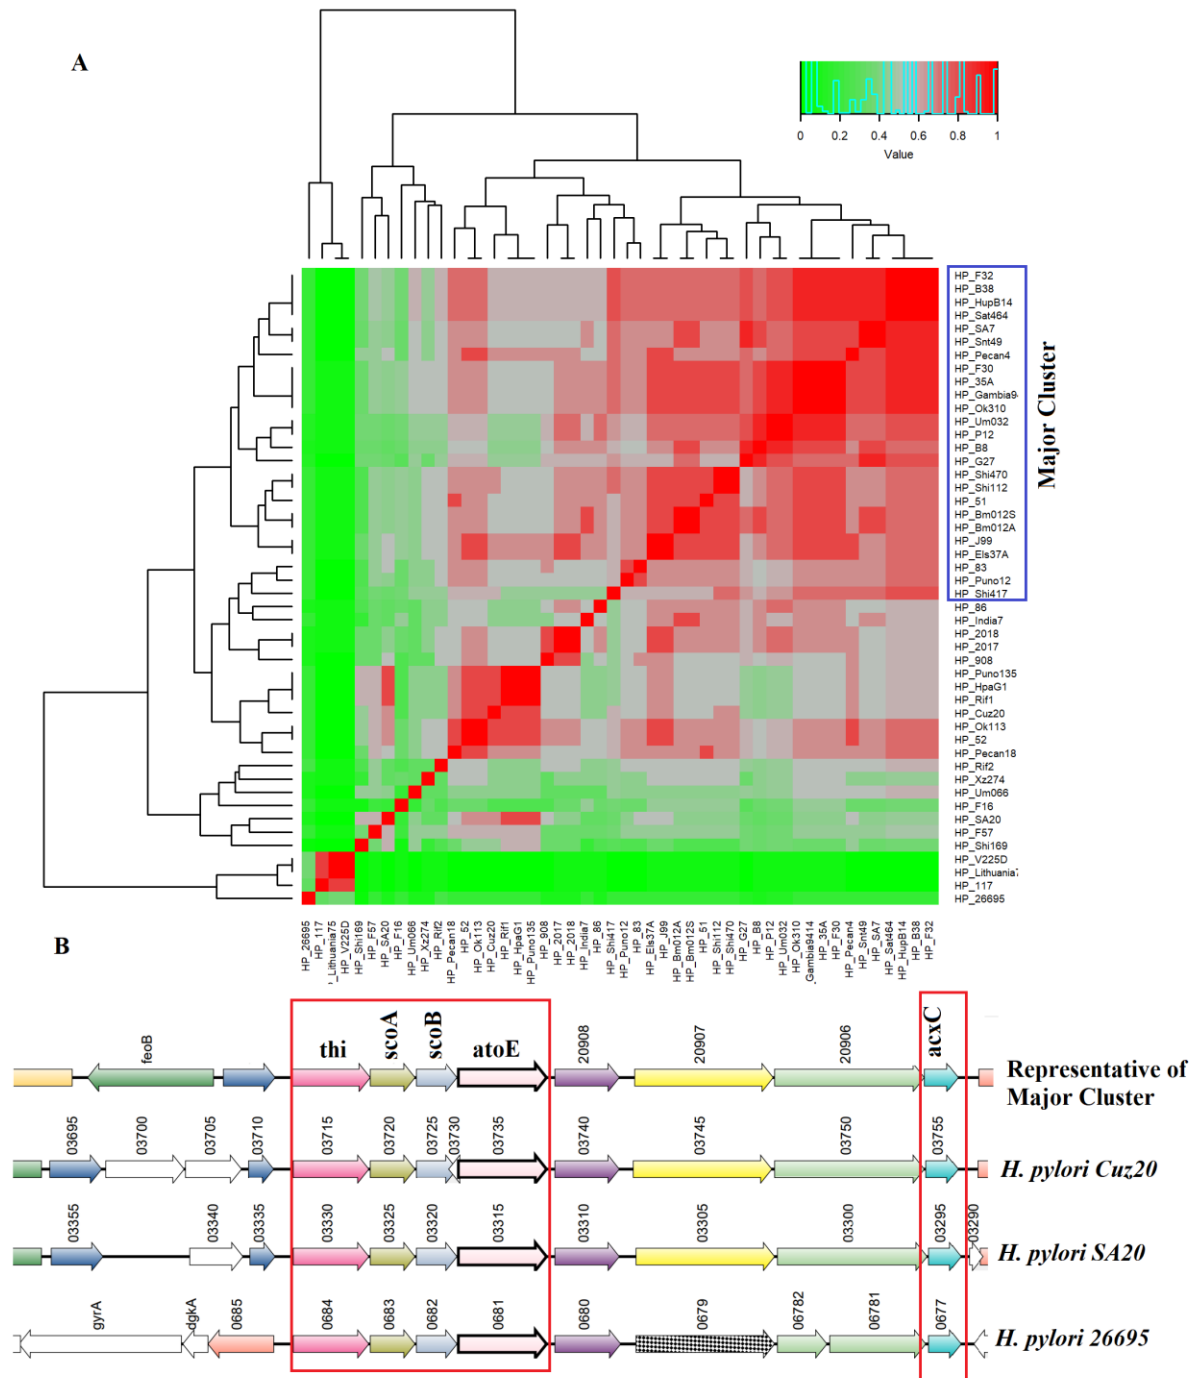

**Supplementary Figure 7.** Comparative genomic study of Acc<sub>20</sub> in fifty strains of *Helicobacter pylori*. **A.** Heatmap of similarity scores using hierarchical clustering. Fifty strains showed one main cluster. :  $S_m \geq 0.70$ ; Grey:  $S_m: \geq 0.4-0.69$ , Green:  $S_m \leq 0.39$ . **B.** Synteny of representative strains from each cluster. The region highlighted in red is the most conserved part.

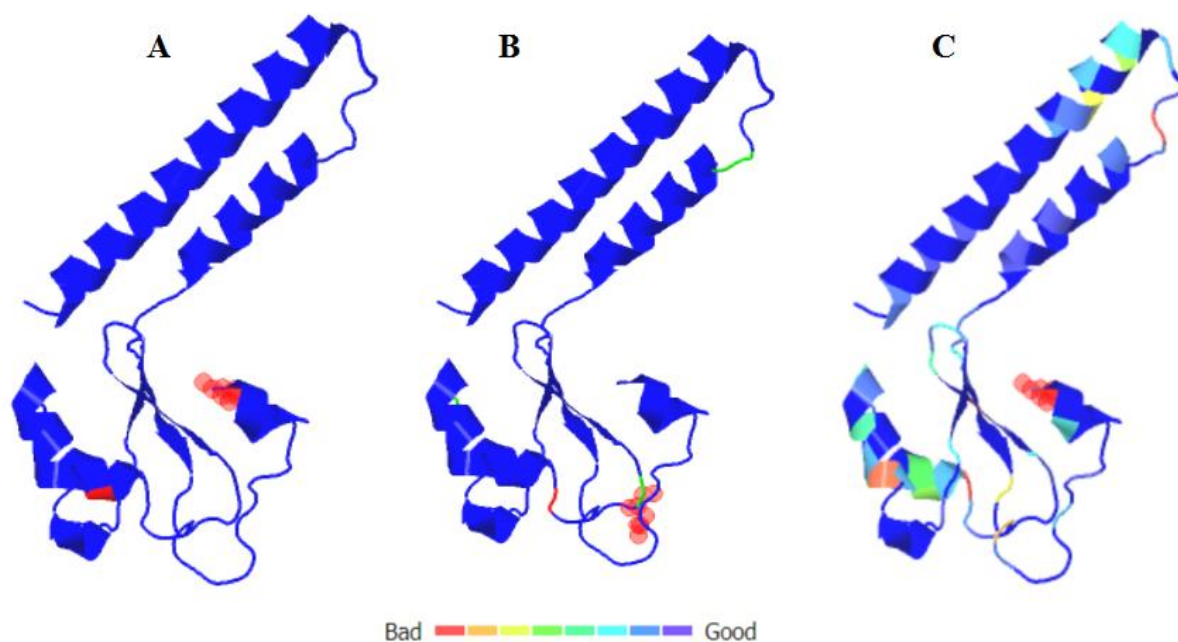

**Supplementary Figure 8.** Quality assessment of homology model of putative toxin. A. Rotamer analysis: Some side chains in the model may not have been modelled ideally. These are coloured in red and may indicate a problem with the backbone or underlying alignment in this region. B. Ramachandran analysis: Some residues in the model may lie in favorable (blue), allowed (green) or disallowed (red) regions of the Ramachandran plot. This colouring indicates residues that may have problems with the backbone phi/psi angles. C. Clash Analysis: Some atoms in some residues may lie too close to one another in the model. Residues are colored by how many clashes are observed. A large number of clashes could mean bad side chain placement.



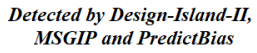

*Detected by  
Design-Island-II  
and MSGIP*

**Supplementary Figure 9:** Synteny study of the Acc\_33. The representative synteny of eight *H. pylori* strains which were not identified by PredictBias is highlighted in the figure.

**Supplementary Table 1: Disease association of 50 *H. pylori* strains**

| <b>Disease</b>      | <b>Number of strains</b> |
|---------------------|--------------------------|
| Duodenal Ulcer (DU) | 8                        |
| Gastric Cancer (GC) | 6                        |
| Gastric Ulcer (GU)  | 3                        |
| Gastritis           | 7                        |
| Peptic Ulcer (PU)   | 3                        |
| Unknown             | 23                       |

**Supplementary Table 2: Geographical Distribution of 50 *H. pylori* strains**

| <b>Country</b>                          | <b>Number of strains</b> |
|-----------------------------------------|--------------------------|
| <b>Canada</b>                           | <b>2</b>                 |
| <b>Malaysia</b>                         | <b>3</b>                 |
| <b>UK</b>                               | <b>1</b>                 |
| <b>Sweden</b>                           | <b>1</b>                 |
| <b>Spain</b>                            | <b>1</b>                 |
| <b>Lithuania</b>                        | <b>1</b>                 |
| <b>Italy</b>                            | <b>1</b>                 |
| <b>Germany</b>                          | <b>1</b>                 |
| <b>France</b>                           | <b>2</b>                 |
| <b>Korea</b>                            | <b>2</b>                 |
| <b>Japan</b>                            | <b>8</b>                 |
| <b>China</b>                            | <b>1</b>                 |
| <b>Australia</b>                        | <b>2</b>                 |
| <b>India</b>                            | <b>2</b>                 |
| <b>Venezuela</b>                        | <b>1</b>                 |
| <b>Peru</b>                             | <b>14</b>                |
| <b>West and South African Countries</b> | <b>7</b>                 |

**Supplementary Table 3:** Functional Characterization of thirty eight accessory islands identified by comparative study fifty *H. pylori* strains

| <b>Name</b> | <b>Function</b>              | <b>Name</b>   | <b>Function</b>                 |
|-------------|------------------------------|---------------|---------------------------------|
| Core_1      | Ribosomal Protein            | Acc_14        | Lysine biosynthetic process     |
| Core_2      | Ribosomal Protein            | Acc_15        | Miscellaneous                   |
| Core_3      | Antibiotic Resistance Island | Acc_16        | Miscellaneous                   |
| Core_4      | VacA island                  | Acc_17        | Lipopolysaccharide biosynthesis |
| Core_5      | Niche adaptation             | Acc_18        | Miscellaneous                   |
| Core_6      | Promoting Ulceration         | Acc_19        | Miscellaneous                   |
| Core_7      | Biofilm Formation            | Acc_20        | Metabolism                      |
| Acc_1       | Niche adaptation             | Acc_21        | Miscellaneous                   |
| Acc_2       | Miscellaneous                | Acc_22        | Miscellaneous                   |
| Acc_3       | Miscellaneous                | Acc_23        | Membrane efflux protein         |
| Acc_4       | Bacterial Transport System   | Acc_24        | Miscellaneous                   |
| Acc_5       | Biosynthesis                 | Acc_25        | Cag pathogenicity Island        |
| Acc_6       | Miscellaneous                | Acc_26        | Miscellaneous                   |
| Acc_7       | Miscellaneous                | Acc_27        | Metabolism                      |
| Acc_8       | Miscellaneous                | Acc_28        | Terpenoid-quinone biosynthesis  |
| Acc_9       | Miscellaneous                | Acc_29        | Cell cycle                      |
| Acc_10      | Miscellaneous                | Acc_30        | Metabolism                      |
| Acc_11      | Miscellaneous                | <b>Acc_31</b> | <b>Putative toxin</b>           |
| Acc_12      | Miscellaneous                | Acc_32        | Purine biosynthesis             |
| Acc_13      | Miscellaneous                | <b>Acc_33</b> | <b>Toxin- antitoxin system</b>  |
| Acc_34      |                              | Miscellaneous |                                 |

**Supplementary Table 4:** Number of *H. pylori* strains detected by different GI prediction tools

| GI Names      | <i>Design-Island-II</i> | MSGIP     | PredictBias | ZislandExplorer | IslandPath-DIMOB | IslandPick |
|---------------|-------------------------|-----------|-------------|-----------------|------------------|------------|
| Acc_1         | 32                      | 0         | 0           | 0               | 0                | 0          |
| Acc_2         | 26                      | 26        | 26          | 0               | 0                | 0          |
| Acc_3         | 34                      | 26        | 31          | 25              | 0                | 0          |
| Acc_4         | 49                      | 0         | 0           | 0               | 0                | 0          |
| Acc_5         | 26                      | 0         | 0           | 0               | 0                | 0          |
| Acc_6         | 27                      | 27        | 27          | 27              | 0                | 0          |
| Acc_7         | 26                      | 16        | 26          | 0               | 0                | 0          |
| Acc_8         | 39                      | 34        | 37          | 31              | 0                | 0          |
| Acc_9         | 45                      | 0         | 0           | 0               | 0                | 0          |
| Acc_10        | 46                      | 46        | 0           | 0               | 0                | 0          |
| Acc_11        | 45                      | 40        | 38          | 0               | 0                | 0          |
| Acc_12        | 33                      | 31        | 29          | 35              | 0                | 0          |
| Acc_13        | 32                      | 32        | 19          | 36              | 0                | 0          |
| Acc_14        | 33                      | 0         | 0           | 0               | 0                | 0          |
| Acc_15        | 39                      | 32        | 32          | 36              | 0                | 0          |
| Acc_16        | 27                      | 22        | 26          | 24              | 0                | 0          |
| Acc_17        | 41                      | 0         | 0           | 0               | 0                | 0          |
| Acc_18        | 39                      | 32        | 33          | 0               | 0                | 0          |
| Acc_19        | 44                      | 42        | 37          | 35              | 0                | 0          |
| Acc_20        | 48                      | 0         | 0           | 0               | 0                | 0          |
| Acc_21        | 47                      | 43        | 42          | 40              | 0                | 0          |
| Acc_22        | 32                      | 34        | 0           | 0               | 0                | 0          |
| Acc_23        | 41                      | 41        | 34          | 0               | 0                | 0          |
| Acc_24        | 44                      | 42        | 0           | 0               | 0                | 0          |
| Acc_25        | 45                      | 45        | 45          | 45              | 45               | 45         |
| Acc_26        | 45                      | 0         | 0           | 0               | 0                | 0          |
| Acc_27        | 40                      | 0         | 0           | 0               | 0                | 0          |
| Acc_28        | 43                      | 0         | 0           | 0               | 0                | 0          |
| Acc_29        | 30                      | 30        | 26          | 26              | 0                | 0          |
| Acc_30        | 30                      | 30        | 27          | 24              | 0                | 0          |
| <b>Acc_31</b> | <b>5</b>                | <b>5</b>  | <b>5</b>    | <b>5</b>        | 0                | 0          |
| Acc_32        | 35                      | 35        | 0           | 0               | 0                | 0          |
| <b>Acc_33</b> | <b>29</b>               | <b>29</b> | <b>21</b>   | 0               | 0                | 0          |
| Acc_34        | 10                      | 0         | 0           | 0               | 0                | 0          |
